# Supplementary material for: Thunbergia laurifolia Leaf Extract Inhibits Glutamate-Induced Neurotoxicity and Cell Death through Mitophagy Signaling
Source: MDPI journal article supplement (doi:10.3390/antiox10111678), 2021-10-25

Figure S1 : Analysis of bioactive compounds in ethanolic *Thunbergia laurifolia* leaves extract by liquid chromatography-mass spectrometry (LC-MS) technique.

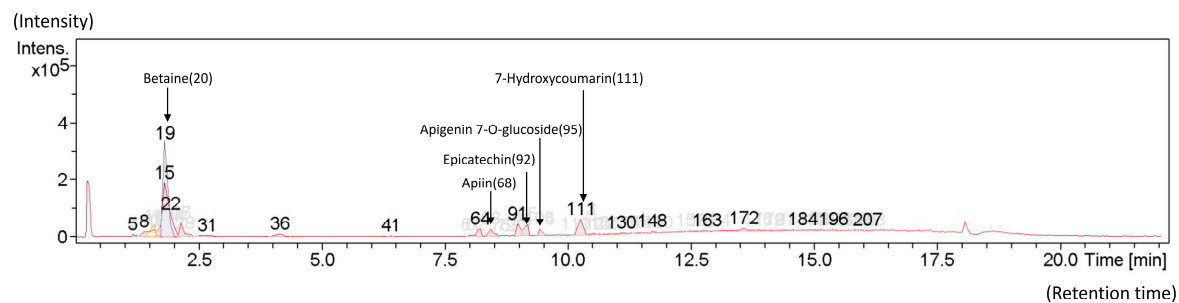

Supplement: s1 [file s1]
